# Supplementary material for: SARS-CoV-2 Fusion Peptide Conjugated to a Tetravalent Dendrimer Selectively Inhibits Viral Infection
Source: MDPI journal article supplement (doi:10.3390/pharmaceutics15122791), 2023-12-17
Supplement: s1 [file s1]

# Supplementary Materials: SARS-CoV-2 Fusion Peptide Conjugated to a Tetravalent Dendrimer Selectively Inhibits Viral Infection

Carla Zannella, Annalisa Chianese, Alessandra Monti, Rosa Giugliano, Maria Vittoria Morone, Francesco Secci, Giuseppina Sanna, Aldo Manzin, Anna De Filippis, Nunziata Doti and Massimiliano Galdiero

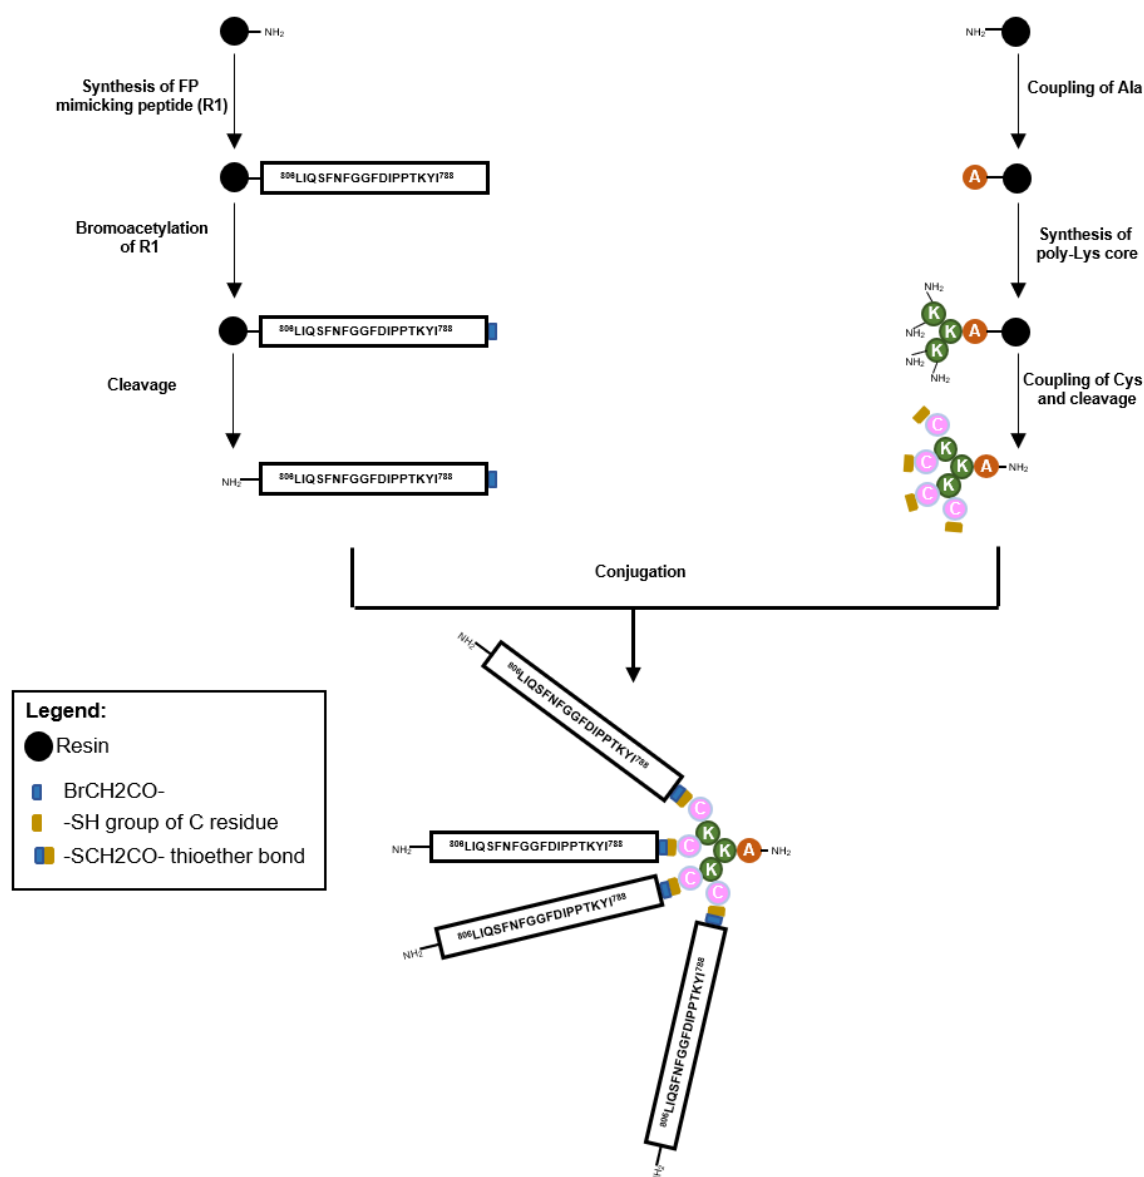

**Scheme S1.** Schematic representation of the peptide dendrimer R1 synthesis process. A) The FP mimetic peptide (Ile-Tyr-Lys-Thr-Pro-Pro-Ile-Lys-Asp-Phe-Gly-Gly-Phe-Asn-Phe-Ser-Gln-Ile-Leu) was synthesized as amidated derivative at the C-terminus using the Rink-Amide MBHA resin (loading 0.5 mmol/g) following the N-9-Fluorenylmethyloxycarbonyl (Fmoc) strategy, using standard procedures [1]. The N-terminal bromoacetylation was performed using a 10-fold excess

of bromoacetic acid and DIC as activator (1:1 eq) in DMF for 1 hour at room temperature. (B) Synthetic sequence for the formation of poly-*L*-Lysine dendrimer functionalized in  $N\alpha$  and  $N\epsilon$  with Cys residues. After the coupling of Fmoc-*L*-Ala-OH on the resin and the subsequent deprotection of Fmoc, the first Fmoc-*L*-Lys(Fmoc)-OH dissolved in DMF was coupled to the Ala and after removal of the Fmoc groups, two more Fmoc-*L*-Lys(Fmoc)-OH residues were coupled. After a subsequent step of Fmoc deprotection, the Fmoc-*L*-Cys-OH, was coupled followed by a step of Fmoc deprotection. The deprotection steps, the coupling steps and the cleavage from the resin were done using standard procedures [1]. (C) Conjugation reaction. The R1 was conjugated to the four dendrimer's thiol groups according to the organic nucleophilic substitution reaction ( $S_N2$ ). Amino acids are shown in single code.

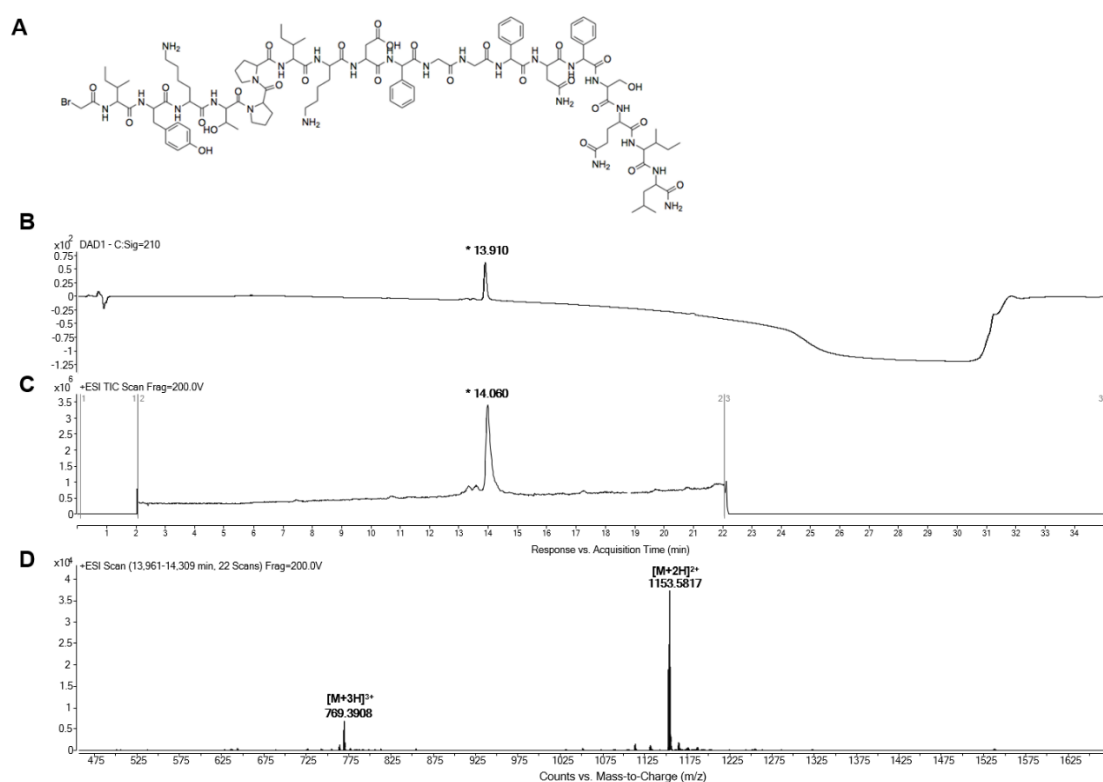

**Figure S1.** Chemical structure of the Br-acetyl peptide R1 (A) and LC-MS analysis (B-D). The asterisk (\*) indicates the chromatographic peak containing the target molecule. The peptide shows a retention time (Rt) of 13,9 min as evidenced of DAD (Diode Array Detector) spectrum. The MS analysis showed the expected mass at m/z: 1153.582 ([M+2H]<sup>2+</sup>) and 769.391 ([M+3H]<sup>3+</sup>). The MS values reported in the figure represent the value of the main peak of the isotopic clusters.

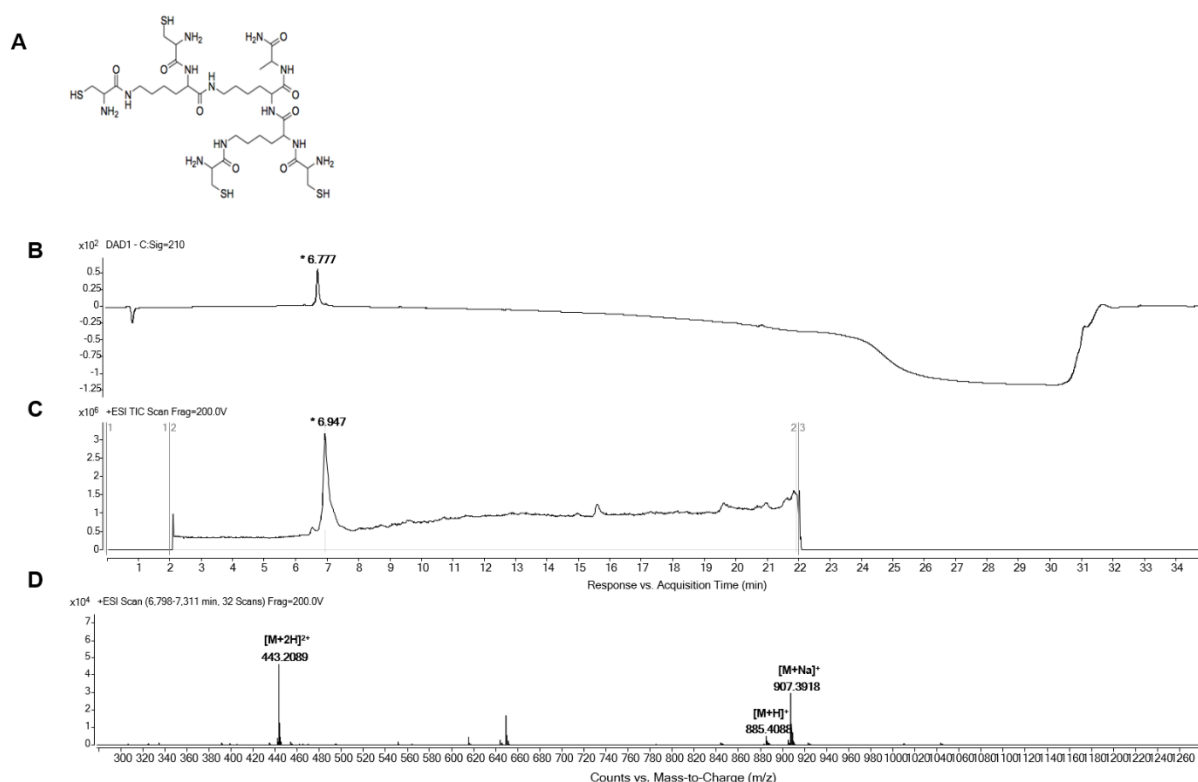

**Figure S2.** (A) Chemical structure of the branched amino acid core and (B-D) LC-MS analysis. The asterisk (\*) indicates the chromatographic peak containing the target molecule. The retention time (tR) value was about 6.78 min as detected by DAD (Diode Array Detector) (B). The MS analysis confirmed the identity of the molecule showing  $m/z$  values at: 907.392 ( $[M+Na]^+$ ); 885.401 ( $[M+H]^+$ ) and 443.209 ( $[M+2H]^{2+}$ ). The MS values reported in the figure represent the value of the main peak of the isotopic clusters.

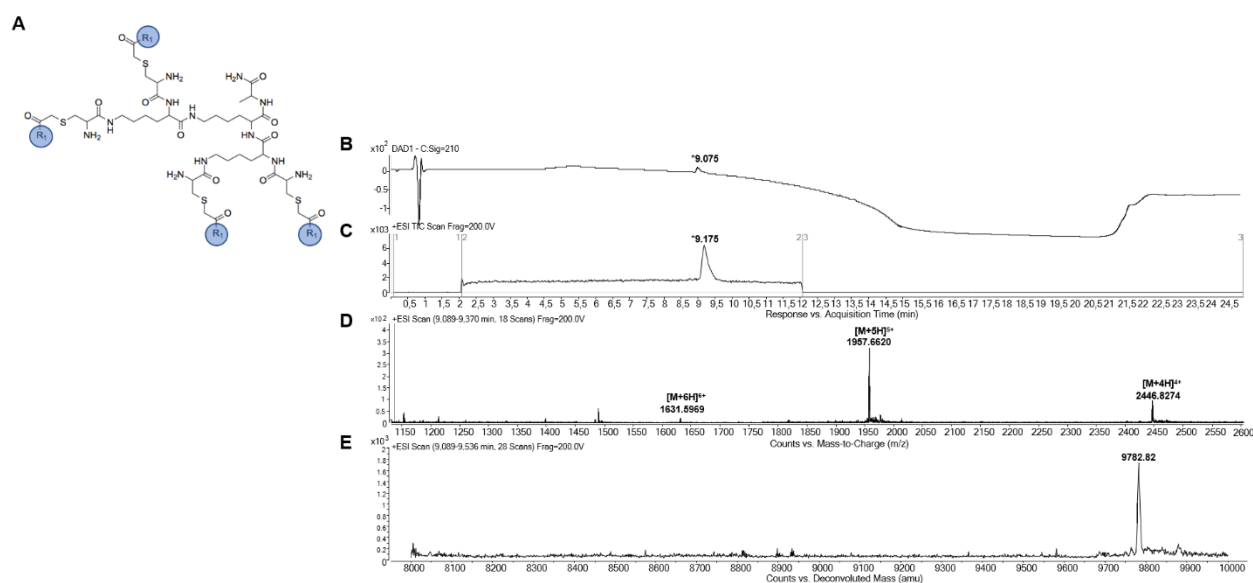

**Figure S3.** (A) Chemical structure of the peptide dendrimer R1 and (B-E) LC-MS analysis. R1s in the circles indicates the peptide sequences. The asterisk (\*) indicates the chromatographic peak containing the target molecule. The retention time (tR) value of the dendrimer was about 9.98 min

as detected by DAD (Diode Array Detector) (B). The MS analysis confirmed the identity of the dendrimer showing m/z values at: 2446.827 ( $[M+4H]^{4+}$ ); 1957.662 ( $[M+5H]^{5+}$ ) and 1631.597 ( $[M+6H]^{6+}$ ). The MS values reported in the figure represent the value of the main peak of the isotopic clusters. The deconvolute mass of 9782.82 amu (D), agrees with the theoretical MW of the molecule.

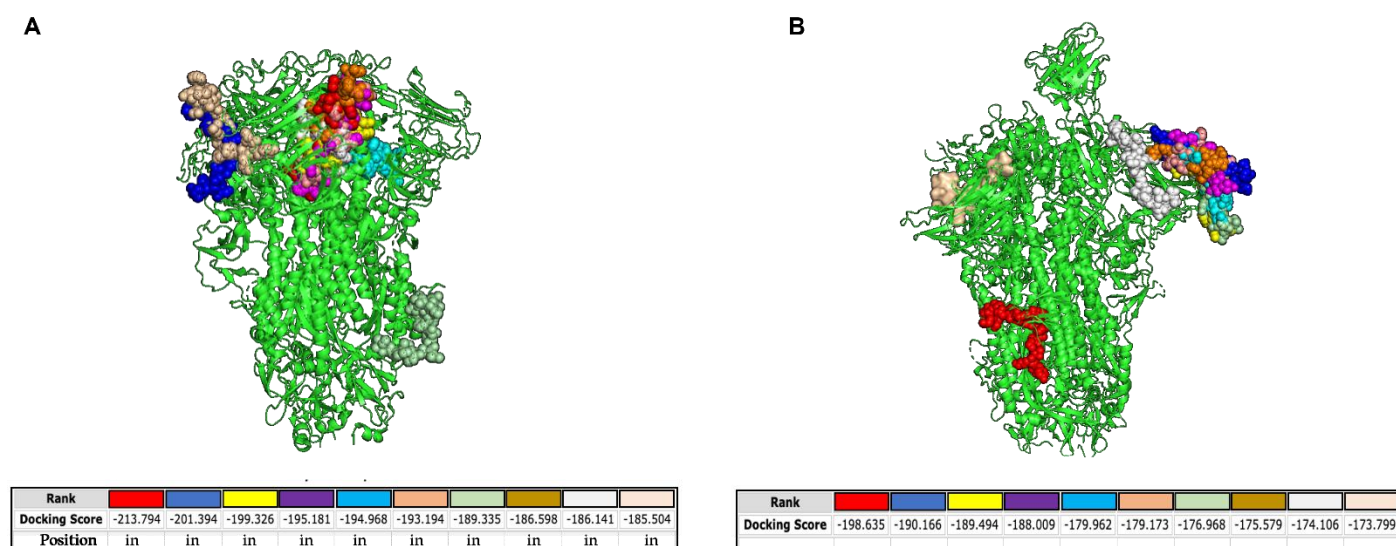

**Figure S4.** Molecular docking. Molecular prediction of SARS-CoV-2 FP (IYKTPPIK-DFGGFNFSQIL) interacting with (A) HCoV-229E S protein (PDB 7CYC) and (B) HCoV-OC43 S protein (PDB 7SBW) obtained by HPEPDOCK server. The different color code of peptide, represented as balls, refers to the different binding free energy.

| Name         | MW (theoretical) | MW (experimental) |
|--------------|------------------|-------------------|
| R1           | 2305.49          | 2305.16           |
| Dendrimer    | 884.37           | 884.41            |
| Dendrimer R1 | 9782.33          | 9782.82           |

**Table S1.** Experimental and theoretical MW of molecules tested in this study.

| <i>ionic interaction</i> |            | <i>hydrophobic contact</i> |             | <i>hydrogen bond</i> |             | <i>weak hydrogen bond</i> |            |
|--------------------------|------------|----------------------------|-------------|----------------------|-------------|---------------------------|------------|
| Ligand atom              | Receptor   | Ligand atom                | Receptor    | Ligand atom          | Receptor    | Ligand atom               | Receptor   |
| O11                      | K417(A) NZ | CA5                        | F456(A) CD2 | O23                  | T415(A) OG1 | O26                       | T385(B) CB |
|                          |            | C40                        | F456(A) CE1 | O24                  | D420(A) OD2 | O23                       | T415(A) CB |
|                          |            | C43                        | F456(A) CZ  | O2                   | Y453(A) OH  | O12                       | K417(A) CE |
|                          |            | CA5                        | Y473(A) CE2 | O2                   | S494(A) O   |                           |            |
|                          |            | C40                        | Y489(A) CD1 | N1                   | Q498(A) OE1 |                           |            |
|                          |            | C11                        | Y495(A) CD1 | O10                  | C379(B) O   |                           |            |
|                          |            | C56                        | Y380(B) CB  | N16                  | G381(B) O   |                           |            |
|                          |            | C24                        | Y380(B) CE2 | N19                  | G381(B) O   |                           |            |
|                          |            | C79                        | V382(B) CG1 | N18                  | G381(B) O   |                           |            |
|                          |            | C45                        | P384(B) CG  | O27                  | S383(B) OG  |                           |            |
|                          |            | C85                        | L390(B) CD1 | N10                  | T385(B) OG1 |                           |            |
|                          |            | C82                        | L390(B) CD2 | N4                   | P412(B) O   |                           |            |
|                          |            | C24                        | P412(B) CG  | O15                  | R403(A) NH2 |                           |            |
|                          |            |                            |             | O20                  | S383(B) N   |                           |            |
|                          |            |                            |             | O21                  | K417(A) NZ  |                           |            |
|                          |            |                            |             | O22                  | K417(A) NZ  |                           |            |
|                          |            |                            |             | N20                  | K417(A) NZ  |                           |            |
|                          |            |                            |             | O25                  | K417(A) NZ  |                           |            |
|                          |            |                            |             | O27                  | S383(B) OG  |                           |            |
|                          |            |                            |             | O23                  | T415(A) OG1 |                           |            |
|                          |            |                            |             | O2                   | Y453(A) OH  |                           |            |
|                          |            |                            |             | O2                   | Q493(A) NE2 |                           |            |

**Table S2.** Putative interaction sites occurring between FP (IYKTPPIKDFGGFNFSQIL) and SARS-CoV-2 S protein (PDB 7CYC).

## References

1. Caporale, A.; Doti, N.; Monti, A.; Sandomenico, A.; Ruvo, M. Automatic procedures for the synthesis of difficult peptides using oxyma as activating reagent: A comparative study on the use of bases and on different deprotection and agitation conditions. *Peptides* **2018**, *102*, 38–46.
